# Supplementary material for: Child-Sensitive WASH Composite Score and the Nutritional Status in Cambodian Children
Source: MDPI journal article supplement (doi:10.3390/nu11092142), 2019-09-07
Supplement: s1 [file s1]

**Supplementary Table 1.** Sub-score classification. Variables used to create JMP-CS and National-CS water, sanitation and hygiene sub-scores which values were classified as “improved” or “not improved”.

| JMP-CS                              | Water Sub-Score                                                                                                                                    |                                                                                                                                                                                                      |                                                                                                                                    |                                                                                                                                                                      |
|-------------------------------------|----------------------------------------------------------------------------------------------------------------------------------------------------|------------------------------------------------------------------------------------------------------------------------------------------------------------------------------------------------------|------------------------------------------------------------------------------------------------------------------------------------|----------------------------------------------------------------------------------------------------------------------------------------------------------------------|
|                                     | Improved                                                                                                                                           |                                                                                                                                                                                                      | Not Improved                                                                                                                       |                                                                                                                                                                      |
|                                     | Baseline                                                                                                                                           | Follow-Ups                                                                                                                                                                                           | Baseline                                                                                                                           | Follow-Ups                                                                                                                                                           |
| <i>Main source of water</i>         | Piped into dwelling<br>Piped into yard/plot<br>Tube well or borehole<br>Pumping well<br>Rainwater<br>Tanker truck or water vendor<br>Bottled water | Piped into dwelling<br>Piped into yard/plot<br>Public tap/standpipe<br>Tube well or borehole<br>Protected dug well<br>Rainwater<br>Protected spring<br>Bottled water<br>Tanker truck or water vendor | Dug well<br>River/dam/stream/lake/pond/<br>canal/irrigation channel<br>Don't know                                                  | Unprotected dug well<br>River/dam/stream/lake/pond/<br>canal/irrigation channel<br>Unprotected spring<br>Don't know                                                  |
| <i>Location of water source</i>     | In own dwelling<br>In own yard/plot                                                                                                                | In own dwelling<br>In own yard/plot                                                                                                                                                                  | Shared with neighbour<br>Public place<br>Don't know                                                                                | Elsewhere<br>Don't know                                                                                                                                              |
| National-CS                         |                                                                                                                                                    |                                                                                                                                                                                                      |                                                                                                                                    |                                                                                                                                                                      |
| <i>Main source of water</i>         | Piped into dwelling<br>Piped into yard/plot<br>Tube well or borehole<br>Pumping well<br>Rainwater                                                  | Piped into dwelling<br>Piped into yard/plot<br>Public tap/standpipe<br>Tube well or borehole<br>Protected dug well<br>Rainwater<br>Protected spring                                                  | Dug well<br>River/dam/stream/lake/pond/<br>canal/irrigation channel<br>Tanker truck or water vendor<br>Bottled water<br>Don't know | Unprotected dug well<br>River/dam/stream/lake/pond/<br>canal/irrigation channel<br>Unprotected spring<br>Bottled water<br>Tanker truck or water vendor<br>Don't know |
| <i>Location of water source</i>     | In own dwelling<br>In own yard/plot                                                                                                                | In own dwelling<br>In own yard/plot                                                                                                                                                                  | Shared with neighbour<br>Public place<br>Don't know                                                                                | Elsewhere<br>Don't know                                                                                                                                              |
| <i>Frequency of water treatment</i> | Yes                                                                                                                                                | Yes always                                                                                                                                                                                           | No<br>Sometimes<br>Don't know                                                                                                      | No<br>Yes sometimes<br>Don't know                                                                                                                                    |

|                                               |                                                                              |                                                                              |                                                                                                      |                                                                                                      |
|-----------------------------------------------|------------------------------------------------------------------------------|------------------------------------------------------------------------------|------------------------------------------------------------------------------------------------------|------------------------------------------------------------------------------------------------------|
| <i>Method used to treat the water</i>         | Boil<br>Bleach<br>Stain<br>Water filter<br>Solar                             | Boil<br>Bleach chlorine<br>Strain through a cloth<br>Ceramic filter<br>Solar | With Alum<br>Stand and settle<br>Don't know                                                          | Stand and settle<br>Don't know                                                                       |
| <i>Frequency of child's water treatment</i>   | Yes                                                                          | Yes always                                                                   | No<br>Sometimes<br>Don't know                                                                        | No<br>Yes sometimes<br>Don't know                                                                    |
| <b>Sanitation Sub-Score</b>                   |                                                                              |                                                                              |                                                                                                      |                                                                                                      |
| <b>Improved</b>                               |                                                                              | <b>Not improved</b>                                                          |                                                                                                      |                                                                                                      |
| <b>JMP-CS</b>                                 | <b>Baseline</b>                                                              | <b>Follow-ups</b>                                                            | <b>Baseline</b>                                                                                      | <b>Follow-ups</b>                                                                                    |
| <i>Type of toilet</i>                         | In-house<br>Outhouse                                                         | Flush/pour flush toilet flush to piped sewer system                          |                                                                                                      |                                                                                                      |
|                                               |                                                                              | Flush/pour flush toilet flush to septic tank                                 |                                                                                                      | Pit latrine without slab/open pit                                                                    |
|                                               |                                                                              | Flush/pour flush toilet flush to pit latrine                                 | Share<br>Public                                                                                      | Bucket toilet                                                                                        |
|                                               |                                                                              | Flush/pour flush toilet flush to somewhere else                              | Dry<br>Field/forest                                                                                  | Hanging toilet<br>Field/forest                                                                       |
|                                               |                                                                              | Flush/pour flush toilet flush don't know where                               | Refuse to respond<br>Don't know                                                                      | Refuse to respond<br>Don't know                                                                      |
|                                               |                                                                              | Ventilated improved pit latrine                                              |                                                                                                      |                                                                                                      |
|                                               |                                                                              | Pit latrine with slab<br>Composting toilet                                   |                                                                                                      |                                                                                                      |
| <i>Strategy used to dispose child excreta</i> | Child used toilet/latrine<br>Thrown by caretaker in toilet/latrine<br>Buried | Child used toilet/latrine<br>Thrown by caretaker in toilet/latrine<br>Buried | Thrown into drain or ditch<br>Thrown into garbage<br>Left in open<br>Refuse to respond<br>Don't know | Thrown into drain or ditch<br>Thrown into garbage<br>Left in open<br>Refuse to respond<br>Don't know |
| <b>National-CS</b>                            |                                                                              |                                                                              |                                                                                                      |                                                                                                      |
| <i>Type of toilet</i>                         | In-house                                                                     | Flush/pour flush toilet flush to piped sewer system                          | Share<br>Public                                                                                      | Pit latrine without slab/open pit                                                                    |
|                                               | Outhouse                                                                     | Flush/pour flush toilet flush to septic tank                                 | Dry<br>Field forest                                                                                  | Bucket toilet<br>Hanging toilet                                                                      |

|                                                                                  |                                                                    |                                                                                                                                                                                                                                    |                                                                                                                |                                                                                                                |
|----------------------------------------------------------------------------------|--------------------------------------------------------------------|------------------------------------------------------------------------------------------------------------------------------------------------------------------------------------------------------------------------------------|----------------------------------------------------------------------------------------------------------------|----------------------------------------------------------------------------------------------------------------|
|                                                                                  |                                                                    | Flush/pour flush toilet flush to pit latrine<br>Flush/pour flush toilet flush to somewhere else<br>Flush/pour flush toilet flush don't know where<br>Ventilated improved pit latrine<br>Pit latrine with slab<br>Composting toilet | Refuse to respond<br>Don't know                                                                                | Field/forest<br>Refuse to respond<br>Don't know                                                                |
| <i>Strategy used to dispose child excreta</i>                                    | Child used toilet/latrine<br>Thrown by caretaker in toilet/latrine | Child used toilet/latrine<br>Thrown by caretaker in toilet/latrine                                                                                                                                                                 | Thrown into drain or ditch<br>Thrown into garbage<br>Buried<br>Left in open<br>Refuse to respond<br>Don't know | Thrown into drain or ditch<br>Thrown into garbage<br>Buried<br>Left in open<br>Refuse to respond<br>Don't know |
| <b>Hygiene Sub-Score</b>                                                         |                                                                    |                                                                                                                                                                                                                                    |                                                                                                                |                                                                                                                |
|                                                                                  | <b>Improved</b>                                                    |                                                                                                                                                                                                                                    | <b>Not improved</b>                                                                                            |                                                                                                                |
| <b>JMP-CS</b>                                                                    | <b>Baseline</b>                                                    | <b>Follow-ups</b>                                                                                                                                                                                                                  | <b>Baseline</b>                                                                                                | <b>Follow-ups</b>                                                                                              |
| <i>Washes hands after cleaning the child's bottom and/or after moving faeces</i> | Yes, after cleaning the child,<br>Yes, after moving the faeces     | Yes, after cleaning the child<br>Yes, after moving the faeces                                                                                                                                                                      | No                                                                                                             | No                                                                                                             |
| <b>National-CS</b>                                                               |                                                                    |                                                                                                                                                                                                                                    |                                                                                                                |                                                                                                                |
| <i>Washes hands after cleaning the child's bottom and/or after moving faeces</i> | Yes, after cleaning the child,<br>Yes, after moving the faeces     | Yes, after cleaning the child<br>Yes, after moving the faeces                                                                                                                                                                      | No                                                                                                             | No                                                                                                             |
